# Supplementary material for: Among older adults, age-related changes in the stool microbiome differ by HIV-1 serostatus
Source: PubMed Central journal article supplement — eBioMedicine. 2019 Jan 23;40:583–94. doi: 10.1016/j.ebiom.2019.01.033 (PMC6413415; doi:10.1016/j.ebiom.2019.01.033), 2019-01-23
Supplement: mmc1.pdf [file mmc1.pdf]

**Age-Related Changes in the Stool Microbiome Differ by HIV-1 Serostatus.**

Jay Liu<sup>1</sup>, Rachel Johnson<sup>2</sup>, Stephanie Dillon<sup>1</sup>, Miranda Kroehl<sup>2</sup>, Daniel N. Frank<sup>1</sup>, Yunus E. Tuncil<sup>3</sup>, Xiaowei Zhang<sup>4</sup>, Diana Ir<sup>1</sup>, Charles E. Robertson<sup>1</sup>, Sharon Seifert<sup>5</sup>, Janine Higgins<sup>6</sup>, Bruce Hamaker<sup>4</sup>, Cara Wilson<sup>1</sup>, and Kristine Erlandson<sup>1</sup>.

<sup>1</sup>University of Colorado Anschutz Medical Campus, Department of Medicine, Division of Infectious Diseases, Aurora, CO, USA, <sup>2</sup>Colorado School of Public Health, Department of Biostatistics and Informatics, Aurora, CO, USA, <sup>3</sup>Food Engineering Department, Ordu University, Ordu, Turkey, <sup>4</sup>Department of Food Science, Purdue University, Lafayette, IN, USA, <sup>5</sup>Children's Hospital Colorado, Department of Pharmacology, Aurora, CO, USA, <sup>6</sup>University of Colorado Anschutz Medical Campus, Department of Pediatrics, Aurora, CO, USA

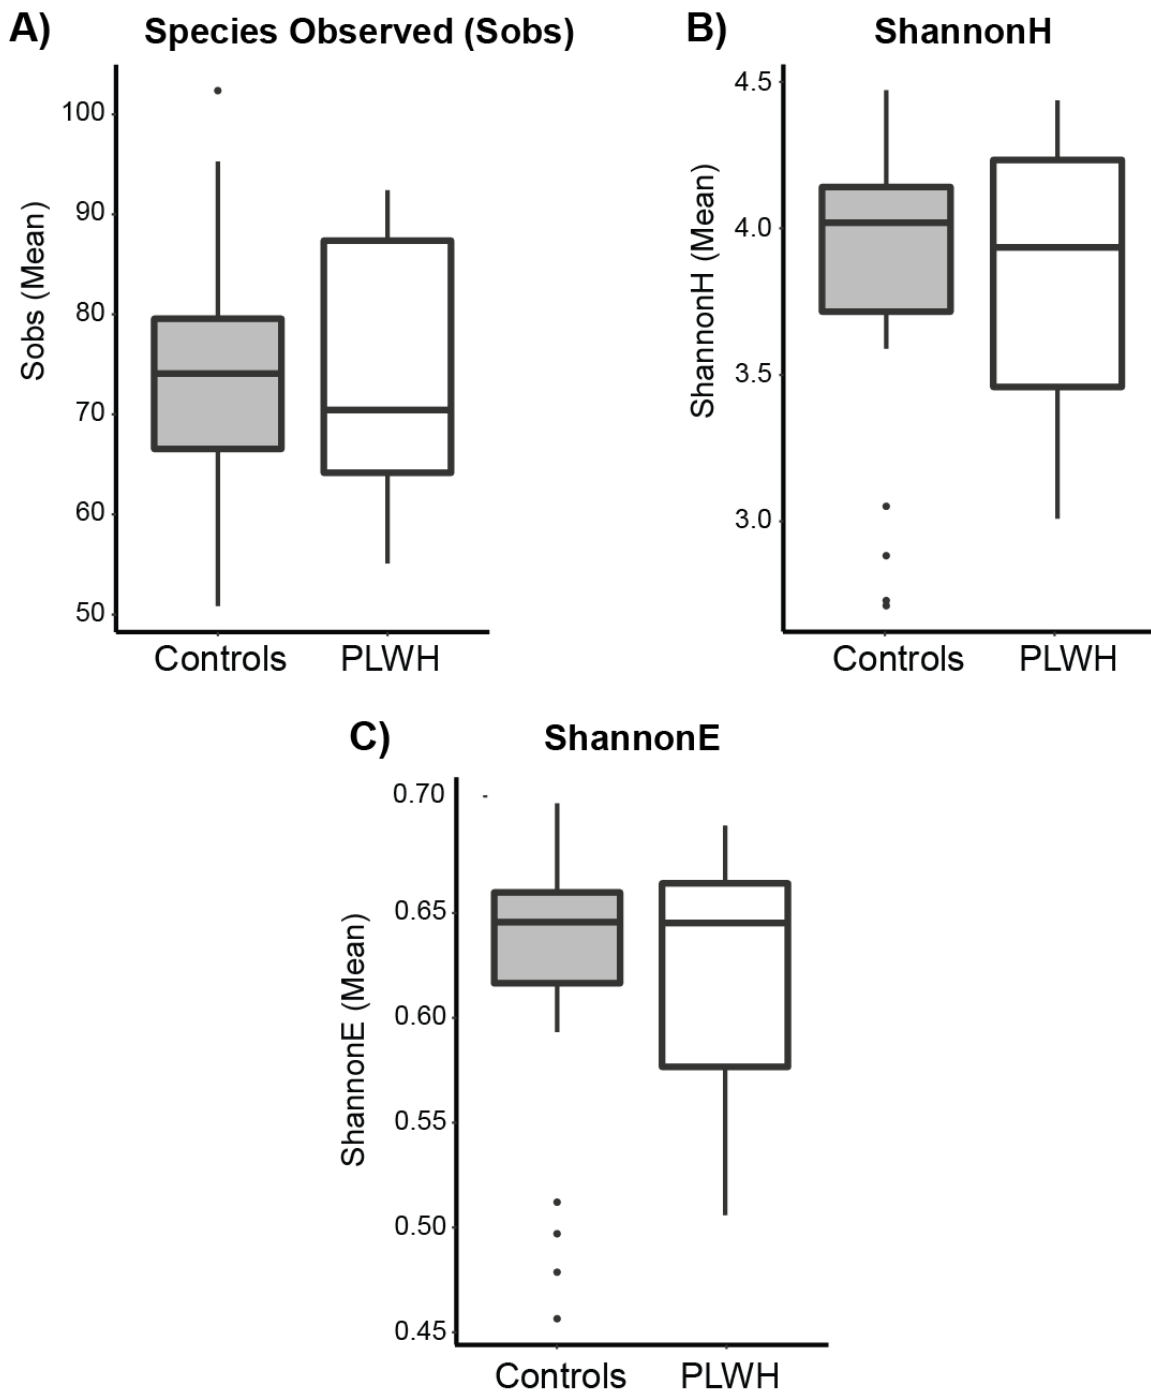

**Supplementary Figure 1.** Alpha-diversity measurements comparing control study participants and people living with HIV (PLWH) and using linear regression models. **(A)** Richness as expressed by species observed (Sobs). **(B)** ShannonH diversity index, a measure of richness. **(C)** ShannonE diversity index, a measure of evenness.

Supplemental Table 1: Impact of HIV on Gut Microbiome

| Phylum                        | Effect        | 95% CI              | FDR p-value       |
|-------------------------------|---------------|---------------------|-------------------|
| Actinobacteria                | 0.76          | 0.41, 1.41          | 0.52              |
| Bacteroidetes                 | 1.03          | 0.73, 1.45          | 0.86              |
| Cyanobacteria                 | 0.16          | 0.03, 0.82          | 0.14              |
| Firmicutes                    | 0.91          | 0.76, 1.07          | 0.46              |
| Fusobacteria                  | 6.94          | 1.01, 47.3          | 0.14              |
| Lentisphaerae                 | 0.21          | 0.01, 2.30          | 0.46              |
| Proteobacteria                | 2.45          | 1.22, 4.89          | 0.13              |
| Synergistetes                 | 21.72         | 1.03, 454.83        | 0.14              |
| Tenericutes                   | 0.44          | 0.063, 3.04         | 0.52              |
| Verrucomicrobia               | 0.82          | 0.12, 5.42          | 0.86              |
| Family                        | Effect        | 95% CI              | FDR p-value       |
| <i>Phylum Actinobacteria</i>  |               |                     |                   |
| Actinomycetaceae              | 0.86          | 0.39, 1.84          | 0.84              |
| Bifidobacteriaceae            | 0.33          | 0.10, 1.09          | 0.23              |
| Coriobacteriaceae             | 0.94          | 0.50, 1.75          | 0.88              |
| <i>Phylum Bacteroidetes</i>   |               |                     |                   |
| Bacteroidaceae                | 0.65          | 0.32, 1.31          | 0.45              |
| Porphyromonadaceae            | 1.11          | 0.53, 2.28          | 0.85              |
| Prevotellaceae                | 2.20          | 0.62, 7.73          | 0.45              |
| Rikenellaceae                 | 0.44          | 0.19, 1.00          | 0.19              |
| <i>Phylum Firmicutes</i>      |               |                     |                   |
| Acidaminococcaceae            | 1.43          | 0.49, 4.15          | 0.69              |
| Christensenellaceae           | 0.59          | 0.26, 1.28          | 0.41              |
| Clostridiaceae                | 0.85          | 0.25, 2.90          | 0.86              |
| Erysipelotrichaceae           | 2.18          | 1.09, 4.32          | 0.12              |
| <b>Lachnospiraceae</b>        | <b>0.72</b>   | <b>0.58, 0.90</b>   | <b>0.03</b>       |
| Lactobacillaceae              | 3.25          | 0.79, 13.32         | 0.29              |
| Peptococcaceae                | 1.07          | 0.32, 3.47          | 0.91              |
| Peptostreptococcaceae         | 0.45          | 0.15, 1.26          | 0.33              |
| Ruminococcaceae               | 1.05          | 0.76, 1.44          | 0.85              |
| Streptococcaceae              | 1.17          | 0.43, 3.12          | 0.85              |
| Veillonellaceae               | 1.47          | 0.55, 3.89          | 0.62              |
| <i>Phylum Fusobacteria</i>    |               |                     |                   |
| Fusobacteriaceae              | 6.10          | 0.87, 42.33         | 0.23              |
| <b>Leptotrichiaceae</b>       | <b>184.09</b> | <b>4.58, 7386.9</b> | <b>0.04</b>       |
| <i>Phylum Proteobacteria</i>  |               |                     |                   |
| Alcaligenaceae                | 1.58          | 0.65, 3.83          | 0.53              |
| <b>Desulfovibrionaceae</b>    | <b>2.94</b>   | <b>1.3, 6.55</b>    | <b>0.047</b>      |
| Enterobacteriaceae            | 2.31          | 0.56, 9.40          | 0.45              |
| <b>Oxalobacteraceae</b>       | <b>0.44</b>   | <b>0.34, 0.54</b>   | <b>&lt;0.0001</b> |
| Pasteurellaceae               | 0.36          | 0.09, 1.36          | 0.33              |
| Rhodospirillaceae             | 0.50          | 0.046, 5.31         | 0.72              |
| Succinivibrionaceae           | 7.78          | 0.78, 76.8          | 0.24              |
| <i>Phylum Synergistetes</i>   |               |                     |                   |
| Synergistaceae                | 21.72         | 1.03, 454.8         | 0.19              |
| <i>Phylum Verrucomicrobia</i> |               |                     |                   |
| Verrucomicrobiaceae           | 0.85          | 0.12, 5.74          | 0.89              |

| Genus                        | SCFA producers <sup>[1-3]*</sup> | Effect        | 95% CI              | FDR p-value       |
|------------------------------|----------------------------------|---------------|---------------------|-------------------|
| <i>Phylum Actinobacteria</i> |                                  |               |                     |                   |
| Bifidobacterium              |                                  | 0.34          | 0.10, 1.12          | 0.26              |
| Collinsella                  |                                  | 0.94          | 0.40, 2.19          | 0.93              |
| <b>Eggerthella</b>           |                                  | <b>0.17</b>   | <b>0.044, 0.62</b>  | <b>0.047</b>      |
| Enterorhabdus                |                                  | 1.56          | 0.33, 7.18          | 0.74              |
| Slackia                      |                                  | 0.70          | 0.11, 4.25          | 0.83              |
| Varibaculum                  |                                  | 0.02          | 5e-04, 0.90         | 0.17              |
| <i>Phylum Bacteroidetes</i>  |                                  |               |                     |                   |
| <b>Alistipes</b>             | propionate                       | <b>0.32</b>   | <b>0.13, 0.77</b>   | <b>0.06</b>       |
| Bacteroides                  | propionate                       | 0.65          | 0.32, 1.31          | 0.48              |
| <b>Barnesiella</b>           |                                  | <b>0.09</b>   | <b>0.03, 0.26</b>   | <b>0.0011</b>     |
| <b>Odoribacter</b>           |                                  | <b>0.70</b>   | <b>0.65, 0.73</b>   | <b>&lt;0.0001</b> |
| Parabacteroides              |                                  | 1.45          | 0.62, 3.37          | 0.59              |
| <b>Paraprevotella</b>        |                                  | <b>1.53</b>   | <b>1.36, 1.72</b>   | <b>&lt;0.0001</b> |
| Prevotella                   | propionate                       | 2.08          | 0.58, 7.32          | 0.50              |
| <i>Phylum Firmicutes</i>     |                                  |               |                     |                   |
| Acidaminococcus              |                                  | 2.61          | 0.30, 22.74         | 0.59              |
| <b>Allisonella</b>           |                                  | <b>2.85</b>   | <b>2.51, 3.23</b>   | <b>&lt;0.0001</b> |
| Anaerostipes                 | butyrate                         | 0.62          | 0.29, 1.32          | 0.47              |
| Anaerotruncus                |                                  | 1.58          | 0.76, 3.24          | 0.47              |
| <b>Anaerovibrio</b>          |                                  | <b>421.75</b> | <b>42.4, 4190.8</b> | <b>&lt;0.0001</b> |
| Blautia                      | propionate                       | 0.81          | 0.56, 1.15          | 0.49              |
| Butyrivibrio                 | butyrate                         | 0.84          | 0.099, 7.15         | 0.93              |
| Catenibacterium              |                                  | 2.85          | 0.64, 12.66         | 0.43              |
| Clostridium                  |                                  | 0.85          | 0.25, 2.90          | 0.90              |
| Coprococcus                  | butyrate, propionate             | 0.88          | 0.53, 1.46          | 0.78              |
| Dialister                    | propionate                       | 1.30          | 0.36, 4.63          | 0.83              |
| Dorea                        |                                  | 1.42          | 0.66, 3.03          | 0.58              |
| Erysipelotrichaceae          |                                  | 1.59          | 0.91, 2.77          | 0.32              |
| Faecalibacterium             | butyrate                         | 0.79          | 0.42, 1.46          | 0.62              |
| Flavonifractor               |                                  | 1.92          | 0.52, 7.00          | 0.56              |
| Holdemania                   |                                  | 0.92          | 0.37, 2.22          | 0.93              |
| <b>Howardella</b>            |                                  | <b>1.74</b>   | <b>1.5, 1.95</b>    | <b>&lt;0.0001</b> |
| Lachnospira                  |                                  | 0.85          | 0.34, 2.12          | 0.86              |
| Lactobacillus                |                                  | 3.25          | 0.79, 13.32         | 0.32              |
| Marvinbryantia               |                                  | 1.63          | 0.61, 4.34          | 0.56              |
| Megamonas                    |                                  | 0.57          | 0.056, 5.75         | 0.78              |
| Megasphaera                  |                                  | 2.93          | 0.48, 17.75         | 0.49              |
| Mitsuokella                  |                                  | 1.06          | 0.043, 25.95        | 0.98              |
| Mogibacterium                |                                  | 6.45          | 1.17, 35.55         | 0.13              |
| Oribacterium                 |                                  | 4.96          | 0.70, 34.66         | 0.32              |
| <b>Oscillospira</b>          |                                  | <b>0.01</b>   | <b>6e-04, 0.091</b> | <b>0.001</b>      |
| Peptococcus                  |                                  | 5.58          | 0.55, 56.23         | 0.41              |
| Phascolarctobacterium        | propionate                       | 1.04          | 0.30, 3.57          | 0.97              |
| Pseudobutyrvibrio            |                                  | 0.55          | 0.21, 1.38          | 0.47              |
| <b>Roseburia</b>             | butyrate, propionate             | <b>0.44</b>   | <b>0.22, 0.85</b>   | <b>0.073</b>      |
| Ruminococcus                 |                                  | 0.51          | 0.19, 1.31          | 0.43              |
| Solobacterium                |                                  | 2.47          | 0.18, 33.49         | 0.66              |
| Streptococcus                |                                  | 1.17          | 0.43, 3.18          | 0.86              |
| Subdoligranulum              | butyrate                         | 0.70          | 0.29, 1.69          | 0.62              |
| Turicibacter                 |                                  | 2.68          | 0.59, 11.96         | 0.46              |

Supplementary Data. Liu *et al.*

|                               |              |                     |                   |
|-------------------------------|--------------|---------------------|-------------------|
| Veillonella                   | 0.50         | 0.12, 2.08          | 0.58              |
| <i>Phylum Fusobacteria</i>    |              |                     |                   |
| Fusobacterium                 | 6.10         | 0.87, 42.29         | 0.24              |
| <i>Phylum Proteobacteria</i>  |              |                     |                   |
| Bilophila                     | 1.48         | 0.54, 4.03          | 0.62              |
| Desulfovibrio                 | 4.71         | 1.19, 18.49         | 0.12              |
| <b>Enterobacter</b>           | <b>73.70</b> | <b>8.08, 671.52</b> | <b>0.0011</b>     |
| Escherichia                   | 0.84         | 0.19, 3.58          | 0.90              |
| Haemophilus                   | 0.39         | 0.10, 1.45          | 0.43              |
| <b>Oxalobacter</b>            | <b>0.43</b>  | <b>0.34, 0.53</b>   | <b>&lt;0.0001</b> |
| Parasutterella                | 1.77         | 0.37, 8.41          | 0.64              |
| Succinivibrio                 | 7.81         | 0.79, 77.22         | 0.26              |
| Sutterella                    | 1.55         | 0.49, 4.84          | 0.62              |
| Thalassospira                 | 0.50         | 0.046, 5.31         | 0.74              |
| <i>Phylum Verrucomicrobia</i> |              |                     |                   |
| Akkermansia                   | propionate   | 0.85                | 0.12, 5.74        |

HIV effect on relative abundance of taxa, with effect size > 1 indicating higher abundance and values <1 indicating lower abundance. **Bold:** taxa with FDR p-value <0.1. FDR = false discovery rate; CI = confidence interval. \*SCFA producers: reflects genera known to contain species with the capacity to produce butyrate or propionate. In some instances, different species within the same genus produce either butyrate or propionate.

Supplemental Table 2: Impact of age on Gut Microbiome

| Phylum                        | Effect                                  | 95% CI            | FDR p-value   |             |
|-------------------------------|-----------------------------------------|-------------------|---------------|-------------|
| Actinobacteria                | 0.97                                    | 0.92, 1.01        | 0.36          |             |
| Bacteroidetes                 | 1.00                                    | 0.97, 1.02        | 0.99          |             |
| Cyanobacteria                 | 0.95                                    | 0.85, 1.07        | 0.66          |             |
| Firmicutes                    | 1.00                                    | 0.99, 1.01        | 0.66          |             |
| Fusobacteria                  | 0.85                                    | 0.74, 0.97        | 0.10          |             |
| Lentisphaerae                 | 0.88                                    | 0.74, 1.03        | 0.35          |             |
| Proteobacteria                | 1.00                                    | 0.94, 1.04        | 0.99          |             |
| <b>Synergistetes</b>          | <b>1.62</b>                             | <b>1.28, 2.04</b> | <b>0.0007</b> |             |
| Tenericutes                   | 0.93                                    | 0.80, 1.06        | 0.46          |             |
| Verrucomicrobia               | 1.00                                    | 0.87, 1.14        | 0.99          |             |
| Family                        | Effect                                  | 95% CI            | FDR p-value   |             |
| <i>Phylum Actinobacteria</i>  |                                         |                   |               |             |
| Actinomycetaceae              | 0.96                                    | 0.91, 1.01        | 0.35          |             |
| Bifidobacteriaceae            | 0.99                                    | 0.91, 1.08        | 0.96          |             |
| Coriobacteriaceae             | 0.96                                    | 0.92, 1.00        | 0.26          |             |
| <i>Phylum Bacteroidetes</i>   |                                         |                   |               |             |
| Bacteroidaceae                | 1.03                                    | 0.98, 1.09        | 0.35          |             |
| <b>Porphyromonadaceae</b>     | <b>1.07</b>                             | <b>1.02, 1.12</b> | <b>0.03</b>   |             |
| Prevotellaceae                | 0.93                                    | 0.85, 1.01        | 0.32          |             |
| Rikenellaceae                 | 0.99                                    | 0.93, 1.05        | 0.93          |             |
| <i>Phylum Firmicutes</i>      |                                         |                   |               |             |
| Acidaminococcaceae            | 1.04                                    | 0.96, 1.12        | 0.46          |             |
| Christensenellaceae           | 1.01                                    | 0.95, 1.06        | 0.86          |             |
| Clostridiaceae                | 0.92                                    | 0.85, 1.00        | 0.26          |             |
| Erysipelotrichaceae           | 0.96                                    | 0.92, 1.01        | 0.42          |             |
| Lachnospiraceae               | 1.01                                    | 0.99, 1.02        | 0.40          |             |
| <b>Lactobacillaceae</b>       | <b>1.14</b>                             | <b>1.04, 1.26</b> | <b>0.03</b>   |             |
| Peptococcaceae                | 1.01                                    | 0.93, 1.10        | 0.91          |             |
| Peptostreptococcaceae         | 1.03                                    | 0.96, 1.11        | 0.57          |             |
| Ruminococcaceae               | 1.00                                    | 0.98, 1.02        | 0.92          |             |
| Streptococcaceae              | 0.95                                    | 0.89, 1.02        | 0.40          |             |
| Veillonellaceae               | 0.97                                    | 0.90, 1.03        | 0.57          |             |
| <i>Phylum Fusobacteria</i>    |                                         |                   |               |             |
| <b>Fusobacteriaceae</b>       | <b>0.81</b>                             | <b>0.71, 0.92</b> | <b>0.01</b>   |             |
| Leptotrichiaceae              | 1.28                                    | 0.97, 1.68        | 0.26          |             |
| <i>Phylum Proteobacteria</i>  |                                         |                   |               |             |
| Alcaligenaceae                | 1.00                                    | 0.93, 1.06        | 0.98          |             |
| Desulfovibrionaceae           | 1.04                                    | 0.97, 1.10        | 0.41          |             |
| Enterobacteriaceae            | 0.96                                    | 0.86, 1.061       | 0.61          |             |
| Pasteurellaceae               | 0.93                                    | 0.84, 1.01        | 0.32          |             |
| Succinivibrionaceae           | 1.05                                    | 0.88, 1.23        | 0.81          |             |
| <i>Phylum Synergistetes</i>   |                                         |                   |               |             |
| <b>Synergistaceae</b>         | <b>1.62</b>                             | <b>1.28, 2.04</b> | <b>0.002</b>  |             |
| <i>Phylum Verrucomicrobia</i> |                                         |                   |               |             |
| Verrucomicrobia               | 1.01                                    | 0.88, 1.15        | 0.94          |             |
| Genus                         | <i>SCFA producers</i> <sup>[1-3]*</sup> | Effect            | 95% CI        | FDR p-value |
| <i>Phylum Actinobacteria</i>  |                                         |                   |               |             |
| Bifidobacterium               |                                         | 1.00              | 0.91, 1.08    | 0.95        |
| Collinsella                   |                                         | 0.97              | 0.91, 1.02    | 0.56        |

|                              |                      |             |                   |                   |
|------------------------------|----------------------|-------------|-------------------|-------------------|
| Eggerthella                  |                      | 0.91        | 0.82, 1.00        | 0.25              |
| Enterorhabdus                |                      | 0.90        | 0.81, 1.00        | 0.25              |
| Slackia                      |                      | 0.96        | 0.84, 1.08        | 0.77              |
| <i>Phylum Bacteroidetes</i>  |                      |             |                   |                   |
| Alistipes                    | propionate           | 1.01        | 0.94, 1.08        | 0.88              |
| Bacteroides                  | propionate           | 1.04        | 0.98, 1.09        | 0.37              |
| Barnesiella                  |                      | 0.99        | 0.91, 1.07        | 0.92              |
| <b>Butyricimonas</b>         |                      | <b>0.96</b> | <b>0.96, 0.97</b> | <b>&lt;0.0001</b> |
| <b>Parabacteroides</b>       |                      | <b>1.09</b> | <b>1.03, 1.15</b> | <b>0.01</b>       |
| Prevotella                   | propionate           | 0.93        | 0.85, 1.01        | 0.36              |
| <i>Phylum Firmicutes</i>     |                      |             |                   |                   |
| Acidaminococcus              |                      | 1.11        | 0.95, 1.28        | 0.45              |
| Allisonella                  |                      | 0.95        | 0.83, 1.08        | 0.72              |
| Anaerostipes                 | butyrate             | 1.00        | 0.94, 1.05        | 0.94              |
| Anaerotruncus                |                      | 0.99        | 0.93, 1.03        | 0.81              |
| Anaerovibrio                 |                      | 1.02        | 0.82, 1.2         | 0.92              |
| Blautia                      | propionate           | 1.02        | 0.99, 1.04        | 0.48              |
| Butyrivibrio                 | butyrate             | 0.84        | 0.73, 0.97        | 0.12              |
| Catenibacterium              |                      | 0.91        | 0.82, 1.01        | 0.28              |
| Clostridium                  |                      | 0.93        | 0.85, 1.00        | 0.27              |
| Coprococcus                  | butyrate, propionate | 1.01        | 0.97, 1.04        | 0.88              |
| Dialister                    | propionate           | 0.98        | 0.89, 1.07        | 0.88              |
| Dorea                        |                      | 0.98        | 0.92, 1.03        | 0.71              |
| Faecalibacterium             | butyrate             | 1.00        | 0.96, 1.05        | 0.92              |
| Flavonifractor               |                      | 1.08        | 0.98, 1.17        | 0.34              |
| Holdemania                   |                      | 1.03        | 0.96, 1.09        | 0.63              |
| <b>Howardella</b>            |                      | <b>0.96</b> | <b>0.95, 0.97</b> | <b>&lt;0.0001</b> |
| Lachnospira                  |                      | 1.02        | 0.95, 1.09        | 0.73              |
| <b>Lactobacillus</b>         |                      | <b>1.15</b> | <b>1.04, 1.26</b> | <b>0.03</b>       |
| Marvinbryantia               |                      | 0.97        | 0.90, 1.0         | 0.59              |
| Megamonas                    |                      | 0.91        | 0.77, 1.06        | 0.51              |
| Megasphaera                  |                      | 0.98        | 0.86, 1.11        | 0.88              |
| Mogibacterium                |                      | 0.96        | 0.84, 1.07        | 0.79              |
| Oribacterium                 |                      | 1.00        | 0.87, 1.15        | 0.95              |
| Oscillospira                 |                      | 1.11        | 0.98, 1.34        | 0.56              |
| Peptococcus                  |                      | 1.01        | 0.84, 1.19        | 0.95              |
| Phascolarctobacterium        | propionate           | 1.02        | 0.93, 1.11        | 0.85              |
| Pseudobutyrvibrio            |                      | 1.04        | 0.97, 1.11        | 0.45              |
| Roseburia                    | butyrate, propionate | 0.99        | 0.94, 1.04        | 0.88              |
| Ruminococcus                 |                      | 0.99        | 0.92, 1.05        | 0.88              |
| Streptococcus                |                      | 0.95        | 0.88, 1.02        | 0.44              |
| Subdoligranulum              | butyrate             | 1.04        | 0.97, 1.10        | 0.48              |
| Turcibacter                  |                      | 1.12        | 1.00, 1.24        | 0.16              |
| Veillonella                  |                      | 1.10        | 0.99, 1.21        | 0.24              |
| <i>Phylum Fusobacteria</i>   |                      |             |                   |                   |
| <b>Fusobacterium</b>         |                      | <b>0.81</b> | <b>0.71, 0.92</b> | <b>0.01</b>       |
| <b>Sneathia</b>              |                      | <b>1.44</b> | <b>1.41, 1.47</b> | <b>&lt;0.0001</b> |
| <i>Phylum Proteobacteria</i> |                      |             |                   |                   |
| <b>Actinobacillus</b>        |                      | <b>0.10</b> | <b>0.05, 0.20</b> | <b>&lt;0.0001</b> |
| Bilophila                    |                      | 1.05        | 0.97, 1.12        | 0.42              |
| <b>Desulfovibrio</b>         |                      | <b>1.04</b> | <b>1.03, 1.04</b> | <b>&lt;0.0001</b> |
| <b>Enterobacter</b>          |                      | <b>0.75</b> | <b>0.62, 0.9</b>  | <b>0.03</b>       |

|                               |            |      |            |      |
|-------------------------------|------------|------|------------|------|
| Escherichia                   |            | 1.03 | 0.92, 1.13 | 0.83 |
| Haemophilus                   |            | 0.93 | 0.84, 1.02 | 0.37 |
| Oxalobacter                   |            | 0.99 | 0.97, 1.00 | 0.25 |
| Parasutterella                |            | 1.07 | 0.96, 1.19 | 0.45 |
| Succinivibrio                 |            | 1.05 | 0.88, 1.23 | 0.83 |
| Sutterella                    |            | 0.97 | 0.89, 1.05 | 0.72 |
| <i>Phylum Verrucomicrobia</i> |            |      |            |      |
| Akkermansia                   | propionate | 1.01 | 0.88, 1.15 | 0.94 |

Age effect on relative abundance of taxa. For every 1 year increase in age, effect size > 1 means higher abundance; effect size < 1 means lower abundance. **Bold:** taxa with FDR p-value < 0.1. FDR = false discovery rate; CI = confidence interval. \*SCFA producers: reflects genera known to contain species with the capacity to produce butyrate or propionate. In some instances, different species within the same genus produce either butyrate or propionate.

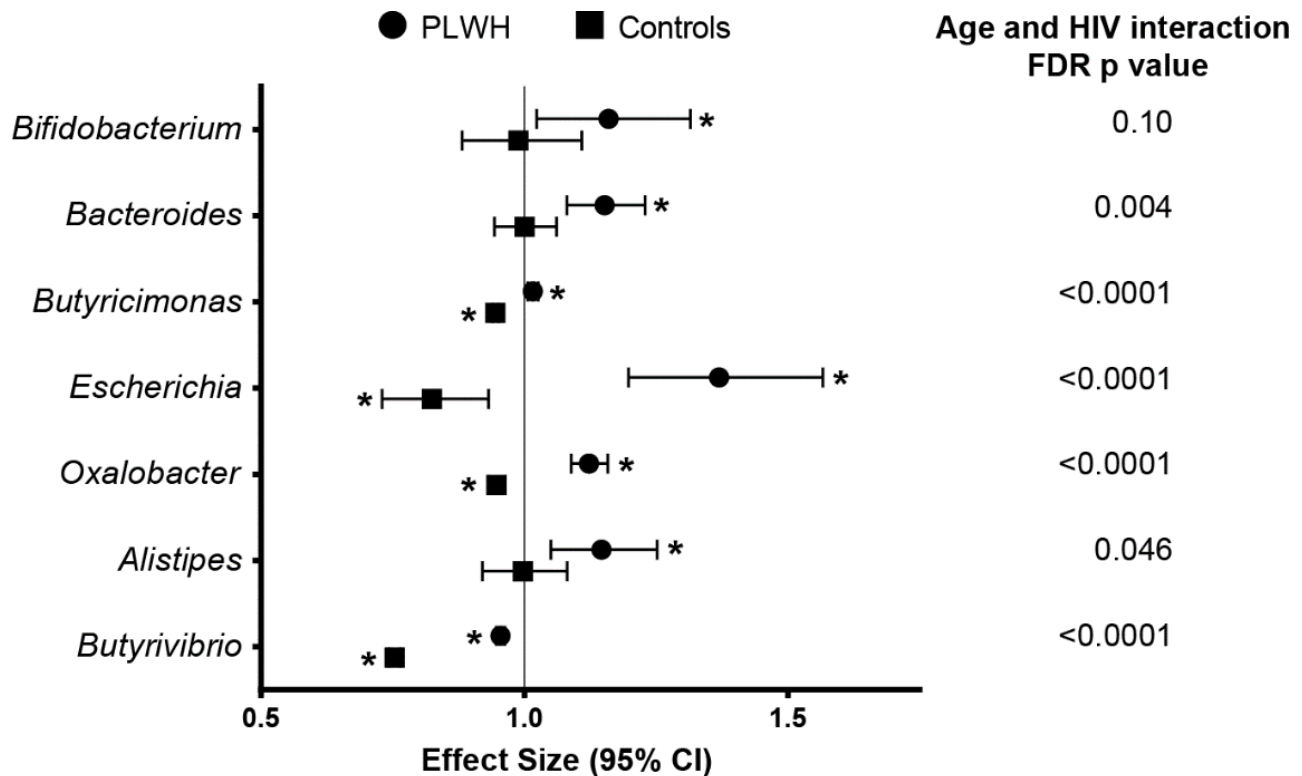

**Supplementary Figure 2. Age Effect by HIV Serostatus on Genus Taxonomic Rank.** The effect size can be interpreted as the per year increase (if >1) or decrease (if <1) in relative abundance of each taxa. \* indicates when the Age effect is significantly different (all FDR p < 0.05) among PLWH (Circles) or Controls (Squares); the Age HIV interaction tests whether the effect of age differs between PLWH and controls. CI = confidence interval.



**REFERENCES.**

1. Louis P, Flint HJ. Diversity, metabolism and microbial ecology of butyrate-producing bacteria from the human large intestine. *FEMS microbiology letters* 2009; 294(1):1-8.
2. Louis P, Flint HJ. Formation of propionate and butyrate by the human colonic microbiota. *Environmental microbiology* 2017; 19(1):29-41.
3. Louis P, Hold GL, Flint HJ. The gut microbiota, bacterial metabolites and colorectal cancer. *Nature reviews Microbiology* 2014; 12(10):661-672.
